# Supplementary material for: Combinatorial targeting of cancer bone metastasis using mRNA engineered stem cells
Source: PubMed Central journal article supplement — eBioMedicine. 2019 Jul 4;45:39–57. doi: 10.1016/j.ebiom.2019.06.047 (PMC6642316; doi:10.1016/j.ebiom.2019.06.047), 2019-07-04
Supplement: mmc6.pdf [file mmc6.pdf]

| Factor       | Information                                                                                                                                            | DNA sequence used for mRNA synthesis                                                                                                                                                                                                                                                                                                                                                                                                                                                                                                                                                                                                                                                                                                                                                                                                                                                                                                                                                                                                                                                                                                                                                                                                                                                                 |
|--------------|--------------------------------------------------------------------------------------------------------------------------------------------------------|------------------------------------------------------------------------------------------------------------------------------------------------------------------------------------------------------------------------------------------------------------------------------------------------------------------------------------------------------------------------------------------------------------------------------------------------------------------------------------------------------------------------------------------------------------------------------------------------------------------------------------------------------------------------------------------------------------------------------------------------------------------------------------------------------------------------------------------------------------------------------------------------------------------------------------------------------------------------------------------------------------------------------------------------------------------------------------------------------------------------------------------------------------------------------------------------------------------------------------------------------------------------------------------------------|
| PSGL-1       | Human P-selectin glycoprotein ligand 1 (24-26, 35).                                                                                                    | ATGCCTCTGCAACTCCTCTGTTGCTGATCCTACTGGGCCCTGGCAACAGCTTGCAGCTGTGGGACACCTGGGCAGATGAAGCCGAGAAAGCCTTGGGTCCCTGCTTGCCTGGG ACCGGAGACAGGGCCACCGAATATGAGTACTAGATTATGATTTCCTGCCAGAAACGGAGCCTCCAGAAATGCTGAGGAACAGCACTGACACCACCTCCTCTGACTGGGCTGGAAAC CCTGAGTCTACCACTGTGGAGCCTGCTGCAAGGCCTTCTACTGGCCTGGATGCAGGAGGGGCAGTCCACAGAGCTGACCACGGAGCTGGCCAAACATGGGGAACTGTCCACGGAT TCAGCAGCTATGGAGATACAGACCCTCAACCAGCAGCCACGGAGGCACAGACCCTCCACTGGCAGCCACAGAGGCACAGACAACCTGACTGACGGCCACGGAGGCACAGACC ACTCCACTGGCAGCCACAGAGGCACAGACCCTCCACCAGCAGCCAGGAGGCACAGACCCTCCACTGGCAGCCACAGAGGCACAGACAACCTGACTGACGGCCACGGAGGCACAGACC CAGACCCTGCACCAGCAGCCATGGAAGCAGACACCCTCCACCAGCAGCCATGGAGGCACAGACCCTCAAAACCAGCCATGGAGGCACAGACCCTGCACCAGAAGCCACG GAGGCACAGACCCTCAACCACAGCCACGGAGGCACAGACCCTCCACTGGCAGCCATGGAGGCCTGTCCACAGAACCAGTCCACAGAGCCCTGTCCATGGAACCTACT ACCAAAAGAGGTCTGTTACACCCCTTTCTGTGCTCTGTACTCACAAGGGCATTCCCATGGCAGCCAGCAATTTGTCCGTCAACTACCCAGTGGGGGCCACGACCACATCTCT GTGAAGCAGTGCCTGCTGGCCATCCTAATCTTGGCGCTGGTGGCCACTATCTTCTCGTGTGACTGTGGTGTGGCGGTCCGCCTCTCCCGCAAGGGCCACATGTACCCCGTGC GTAATTACTCCCCACCGAGATGGTCTGCATCTATCCCTGTTGCCTGATGGGGGTGAGGGCCCTTGCCACAGCAATGGGGCCCTGTCCAAAGGCAAGGCCGGCCGTGAC GCCAGAGCCAGGGAGCCGTGAGGGGGATGACCTCACCCCTGCACAGCTTCTCCCTTAG                                                                |
| SLEX (FUT-7) | Human Alpha-(1,3)-fucosyltransferase which adds Sialyl-Lewis X oligosaccharides to PSGL-1 scaffold (24-26, 35).                                        | ATGAATAATGCTGGGCACGGCCCAACCCGGAGCTGGCAGGCTTGGGGTCTGGCCGGGGTGGCTCTGCTGCTGCTGCCCTCTGGCTCTGTGGTGTGGGTGAGCCCTCG GGGTACCCCGGCACCCAGCCAGCAGATCACCATCCTTGTCTGGCACTGGCCCTTCACTGACCAGCCCCAGAGCTGCCAGCGACACCTGCACCCGCTACGGCATCGCCGCTG CCACCTGAGTGCCAAACCGAAGCCTGCTGCCCAGCGCCGACCGCTGGTCTTCCACCACCCGAGGCTGCAGACCCGGCGTCCACCTGCCCTGGCCAGCGCCGCGAGGGC AGCCCTGGGTGGGGCCTCCATGGAGTCTCCTATGCCACACCCACGGCCTGACCCACCCGAGCATTCAACTGGGTGCTGAGCTACCGCCAGTCCGGACATCTTTGTGCC CTATGGCCGCTGGAGCCCACTGGGGCCCTGCCACCCGCTGCCAGCAAGAGCAGGGTGGCCGCTGGTGGTCAAGCACTCCAGGAGCGGCAGCTGCTGCCAGGCTGT ACCGGCAGCTGGCGCCTCATCTGCGGGTGGATGTCTTTGGCCGTGCCAATGGACGGCCACTGTGCGCCAGCTGCCTGGTGGCCACCGTGGCCAGTCCACCTGTCCCT TGAGAACTCTCAGCACCGGACTACATTACGGAGAAATCTGGCCAAACGCACTGGTGGCTGGCACTGTGCCAGTGGTGTGGGGCCCAAGCCACCTATGAGGCTTCTGTG CCGGCTGACGCTTCTGTCATGTGGATGACTTTGGCTCAGCCGAGAGCTGGCGGCTTCTCACTGGCATGAATGAGAGCCGATACCAACGCTTCTTGGCTGGCTGACAGGC TCCGCGTGGCACTGTTACCGACTGGCGGGAACGTTCTGTGCCATCTGTGACCGCTACCCACACTACCCCGCAGCCAAGTCTATGAGGACCTTGGGGTGGTTTCAGGCTGA                                                                                                                                                                                                                                                                                |
| CD           | Yeast cytosine deaminase fused to the UPRT to increase enzyme efficiency (27).                                                                         | ATGGTACAGGAGGCAATGGCTTCAAAGTGGGACCAGAAGGGCATGGCAATTGCTATGAGGAGGCTGCTCTGGGCTACAAGGAGGGAGGGTCCCAATTTGGTGGCTGCCTCATCA ACAACAAGATGGCAGTGTCTGGGAGGGGGCCACAACATGAGGTTGCAGAAAGGGCAGTCCACCTCATGGGAGATGAGCACCCTGGAGAAGTGGCAGGCTGGAGGGCA AGGTCTACAAGGACACCCTCTGTACACCACCTCAGCCCTGTGACATGTGCACAGGGCCATCATATGATGGCATTCCAGGTGTGGTGGGAGAGAATGCAACTTCAAG TCAAAGGAGAGAAGTACTCCAGACCAGGGCCATGAGGTGGTGTGGTGGATGATGAGAGGTGCAAGAAGATTATGAAGCAGTTCATTGATGAGAGACCCAGGACTGGTTTGA GGACATTTGGGAGGGCCTTGAGCCCTTCAAGAATGTGTACCTCCTCCCCAGACCAACCAACTCCTGGGACTATACACCATCATCAGGAACAAGAACCACCCAGGCCAGACTTCA TCTTCTACAGTGACAGGATCATCAGGCTCCTGGTGGAGGAGGGCCTCAACCACCTCCCTGTGCAGAAGCAGATTGTGGAGACTGACACCAATGAGAAGCTTTGAGGGAGTGTCTTTC ATGGGCAAGATTTGTGGGGTGTCCATTTGTGAGGGCTGGGGAGAGCATGGAGCAGGGCTGAGGGACTGTTGCAGGAGTGTGAGGATTGGCAAGATCCTGATCCAGAGGGATGAG GAGACTGCCCTGCCAAGCTGTTCTATGAGAAGCTCCCTGAAGACATCTGTGAGAGTATGTCTTCTCCTGGACCCCATGCTGGCAACTGGAGGCTCTGCAATCATGGCCACTGA GGTGCTCATCAAGAGGGGAGTCAAGCTGAGAGGATCTACTTCTCAACCTCATCTGCTCAAAGGAGGGCATTGAGAAGTACCATGCTGCCTTCCCTGAAGTGAAGTGTCACTG GGGCTGTGGACAGGGGCTGGATGAGAACAAGTACCTGGTCCCTGGCCTGGGAGACTTTGGGGACAGATACTACTGTGTCTAA                                                                                                                                                          |
| OPG          | Truncated human osteoprotegerin (aa 1-194) containing a Y49R mutation to prevent binding to TRAIL and fused to the Fc fragment of human IgG1 (28, 29). | ATGAACAAGTGTGCTGTGCTGCGCGCTCGTGTCTTCTGGACATCTCCATTAAGTGGACCACCCAGGAAACGTTTCTCCAAAGTACCTTCAATATGACGAAGAAACCTCTCATCAGCTGT TGTGTGACAAATGTCCTCCTGGTACCTACCTAAAACAACACTGTACAGCAAAGTGAAGACCCGTGTGCGCCCTTGCCTGACCACTACCGCACAGACAGCTGGCACACCAGTGA CAGTGTCTATACTGCAGCCCGTGTGCAAGGAGCTGCAGTACGTCAGCAGGAGTGAATCGCACCCACAACCCGCTGTGCGAATGCAAGGAAGGGCCCTACCTTGAGATAGAT TCTGCTTGAACATAGGAGCTGCCCTCCTGGATTTGGAGTGGTGCAGCTGGAACCCAGAGCCGAAATACAGTTTGCAAAAGATGTCCAGATGGGTTCTTCTCAAATGAGACGTCAT CTAAGACCCCTGTAGAAAACACACAAATGTCAGTGTCTTGGTCTCCTGCTAACTCAGAAAGGAAATGCAACACACAGACAACATATGTTCCGGAACAGTGAATCAACTCAAAAAGA CAAAACCTCACACATGCCACCGTGGCCAGCAGCTGAACCTCCTGGGGGACCCGTGAGTCTTCTTCCCCCAAAACCAAGGACACCCTCATGATCTCCGGACCCCTGAGGTCA CATGCGTGGTGGTGGACGTGAGCCACGAAGACCCCTGAGGTCAAAGTTCAACTGGTGTGAGCGGAGCCGTGGAGGTGCATAATGCCAAGACAAGCCCGGGAGGGAGCAGTACAACA GCACGTACCGTGTGGTCAAGCTCCTCACCGTCTGCACCAGGACTGGCTGAATGCAAGGAGTACAAGTCAAGGCTCCAAACAAAGCCCTCCAGCCCCCTCGAGAAAACCAT CTTCCAAAGCCAAAGGGCAGCCCGGAGAACCACAGGTGTACACCCTGCCCCCTCCCGGAGGAGATGACCAAGAACCAGGTCAGCCTGACCTGCCTGGTCAAAGGCTTCTATCCC AGCGACATCGCCGTGGAGTGGGAGAGCAATGGGCAGCCGAGAAACAACCTACAAGACCAAGCCCTCCCGTGTGACTCCGACCGGCTCCTTCTTCTCTACAGCAAGCTCACCGTGG ACAAGAGCAGTGGCAGCAGGGGAACGCTTCTCATGCTCCGTGATGCACGAGGCTGTGCACAACTACACCGCAGAAAGAGCCTTCCCTGTCTCGGGTAAATGA |

**Supplementary Table 1: DNA coding sequences used for mRNA synthesis of homing and therapeutic factors.**

PSGL-1 bearing SLEX post-translational serves as a counterreceptor for P- and E-selectin, thus mediating the rolling/tethering of engineered MSC towards tumour site. The CD expressed by PSGL-1/SLEX/CD/OPG MSC is fused to the uracil phosphoribosyltransferase (UPRT), which increases its ability to convert the 5-FC pro-drug into the 5-FU chemotherapeutic drug. The OPG secreted by engineered MSC inhibits osteoclastic activity without preventing TRAIL-induced apoptosis thanks to an Y49R mutation in the binding site for TRAIL. The modified OPG is a truncated form of the native protein (no binding to glycosaminoglycans) fused to the Fc fragment of human IgG1 (for increased half-life).

| Time-point            | Comparison           | Model-based Estimate | Raw P  | Adjusted P |
|-----------------------|----------------------|----------------------|--------|------------|
| Right after treatment | CD/OPG MSC - CD MSC  | -0.64 (-1.80, 0.52)  | 0.2830 | 0.4043     |
|                       | CD/OPG MSC - OPG MSC | -1.88 (-3.04, -0.72) | 0.0025 | 0.0123     |
|                       | CD MSC - PBS         | -1.81 (-3.09, -0.54) | 0.0073 | 0.0244     |
|                       | OPG MSC - PBS        | -0.58 (-1.85, 0.70)  | 0.3796 | 0.4745     |
|                       | CD/OPG MSC - PBS     | -2.45 (-3.73, -1.18) | 0.0004 | 0.0039     |
| End-point             | CD/OPG MSC - CD MSC  | -0.24 (-2.25, 1.76)  | 0.8127 | 0.8127     |
|                       | CD/OPG MSC - OPG MSC | -0.72 (-2.73, 1.28)  | 0.4829 | 0.5366     |
|                       | CD MSC - PBS         | -2.45 (-4.66, -0.25) | 0.0332 | 0.0664     |
|                       | OPG MSC - PBS        | -1.98 (-4.18, 0.23)  | 0.0843 | 0.1405     |
|                       | CD/OPG MSC - PBS     | -2.70 (-4.90, -0.49) | 0.0197 | 0.0494     |

**Supplementary Table 2: CD/OPG MSC treatment inhibits tumour growth of MDA-MB231 tumours implanted in the tibias of Nude mice.** A pilot experiment was done to assess the efficacy of CD and OPG therapeutic factors *in vivo*. The following treatments were done locally after inducing intratibial tumours: PBS, CD MSC (PSGL-1/SLEX/CD MSC), OPG MSC (PSGL-1/SLEX/OPG MSC) and CD/OPG MSC (PSGL-1/SLEX/CD/OPG MSC), n=4 per group. From the results of that experiment, a power analysis was done to determine the minimal number of mice to include for the final study. This study, presented in the main figures, contains the following groups: PBS, Mock MSC (Mock transfected MSC), CD MSC (PSGL-1/SLEX/CD MSC), OPG MSC (PSGL-1/SLEX/OPG MSC) and CD/OPG MSC (PSGL-1/SLEX/CD/OPG MSC), n=10 per group. A linear mixed model (LMM) was used to compare the tumour growth ratio (bioluminescence values at different time-points normalised to value before treatment) among different treatment groups with a random effect to adjust for the potential mice correlation within each experiment. As the first experiment did not include Mock MSC, we used PBS as our control group here for comparisons. A method of false discovery rate (FDR) was used to correct for multiple comparisons. Table shows the pairwise group comparisons of interest. First column contains the model-based average of natural log of tumour growth ratio for each treatment group at two different time points (right after the treatment, and at the end-point). The 95% confidence interval was provided in the parenthesis. Adjusted P is the *p* value after FDR correction.

| Outcome                            | Comparison           | Model-based Estimate | Raw P  | Adjusted P |
|------------------------------------|----------------------|----------------------|--------|------------|
| Trabecular bone volume (End-point) | CD/OPG MSC - CD MSC  | 0.06 (-0.19, 0.32)   | 0.6447 | 0.6447     |
|                                    | CD/OPG MSC - OPG MSC | -0.12 (-0.38, 0.14)  | 0.3606 | 0.4507     |
|                                    | CD MSC - PBS         | 0.30 (0.01, 0.59)    | 0.0447 | 0.0745     |
|                                    | OPG MSC - PBS        | 0.48 (0.19, 0.77)    | 0.0018 | 0.0090     |
|                                    | CD/OPG MSC - PBS     | 0.36 (0.08, 0.64)    | 0.0152 | 0.0379     |

**Supplementary Table 3: OPG MSC and CD/OPG MSC treatments prevent bone loss induced by MDA-MB231 tumours in the tibias of Nude mice.** A pilot experiment was done to assess the efficacy of CD and OPG therapeutic factors *in vivo*. The following treatments were done locally after inducing intratibial tumours: PBS, CD MSC (PSGL-1/SLEX/CD MSC), OPG MSC (PSGL-1/SLEX/OPG MSC) and CD/OPG MSC (PSGL-1/SLEX/CD/OPG MSC), n=4 per group. From the results of that experiment, a power analysis was done to determine the minimal number of mice to include for the final study. This study, presented in the main figures, contains the following groups: PBS, Mock MSC (Mock transfected MSC), CD MSC (PSGL-1/SLEX/CD MSC), OPG MSC (PSGL-1/SLEX/OPG MSC), and CD/OPG MSC (PSGL-1/SLEX/CD/OPG MSC), n=10 per group. A linear mixed model (LMM) was used to compare the tumour growth among different treatment groups with a random effect to adjust for the potential mice correlation within each experiment. As the first experiment did not include Mock MSC, we used PBS as our control group here for comparisons. A method of false discovery rate (FDR) was used to correct for multiple comparisons. Table shows the pairwise group comparisons of interest. First column contains the model-based average of natural log of tumour growth ratio for each treatment group at two different time points (right after the treatment, and at the end-point). The 95% confidence interval was provided in the parenthesis. Adjusted P is the *p* value after FDR correction.

**Supplementary Table 4: PSGL-1/SLEX/CD/OPG MSC treatment preserves trabecular bone integrity.**

|                       | Trabecular volume (mm <sup>3</sup> ) |             |
|-----------------------|--------------------------------------|-------------|
|                       | HEALTHY LEG                          | TUMOUR LEGS |
| <b>CT</b>             | 0.52001                              | 0           |
|                       | 0.40861                              | 0           |
| <b>Native MSC</b>     | 0.39211                              | 0           |
|                       | 0.40878                              | 0           |
| <b>Engineered MSC</b> | 0.34741                              | 0.36487     |
|                       | 0.58204                              | 0.4962      |

Trabecular bone volume values are shown for each animal (in mm<sup>3</sup>) at the end-point of the experiment for tumour bearing legs and their corresponding healthy legs (2 animals per group). Trabecular bone volume was measured over 1.4mm (100 slices), starting from the growth plate of the tibia.

**Supplementary Table 5: List of antibodies used in the study.**

| Type             | Use | Target                    | Clone/Specie              | Conjugate | Manufacturer                        | Dilution used |
|------------------|-----|---------------------------|---------------------------|-----------|-------------------------------------|---------------|
| Primary antibody | WB  | Human IgG (Fc specific)   | Polyclonal Goat           | N/A       | Sigma (I2136)                       | 1:500         |
| Primary antibody | WB  | Human/murine GAPDH        | Monoclonal (14C10) Rabbit | N/A       | Fisher Scientific (50190704)        | 1:1,000       |
| Primary antibody | WB  | Yeast cytosine deaminase  | Polyclonal Sheep          | N/A       | Fisher Scientific (PA185365)        | 1:500         |
| Primary antibody | IF  | Human PSGL-1              | Monoclonal (PL1) Mouse    | N/A       | Santa Cruz Biotechnology (sc-18855) | 1:100         |
| Primary antibody | IF  | Murine CD62P              | Polyclonal Goat           | N/A       | R&D systems (AF737)                 | 1:50          |
| Primary antibody | IF  | Murine CD41               | Monoclonal (MWRReg30) Rat | N/A       | Abcam (ab206636)                    | 1:50          |
| Primary antibody | IF  | Murine endomucin          | Monoclonal (V.7C7.1) Rat  | N/A       | Abcam (ab106100)                    | 1:100         |
| Primary antibody | FC  | Murine CD45               | Monoclonal (30-F11) Rat   | FITC      | TONBO (35-0451)                     | 1:50          |
| Primary antibody | FC  | Human/murine CD45R (B220) | Monoclonal (RA3-6B2) Rat  | APC       | TONBO (20-0452)                     | 1:50          |
| Primary antibody | FC  | Human/murine CD11b        | Monoclonal (M1/70) Rat    | PE        | TONBO (50-0112)                     | 1:50          |
| Primary antibody | FC  | Murine Gr-1               | Monoclonal (RB6-8C5) Rat  | PE-Cy7    | TONBO (60-5931)                     | 1:50          |

|                    |    |            |                   |                 |                                      |          |
|--------------------|----|------------|-------------------|-----------------|--------------------------------------|----------|
| Secondary antibody | IF | Murine IgG | Polyclonal Donkey | Alexa Fluor 488 | Jackson ImmunoResearch (715-545-150) | 1:1,000  |
| Secondary antibody | IF | Goat IgG   | Polyclonal Donkey | Alexa Fluor 647 | ThermoFisher (A21447)                | 1:1,000  |
| Secondary antibody | IF | Sheep IgG  | Polyclonal Donkey | Alexa Fluor 488 | Jackson ImmunoResearch (713-545-003) | 1:1,000  |
| Secondary antibody | IF | Rat IgG    | Polyclonal Donkey | Alexa Fluor 647 | Abcam (ab150155)                     | 1:1,000  |
| Secondary antibody | IF | Goat IgG   | Polyclonal Donkey | DyLight 755     | Fisher Scientific (SA510091)         | 1:500    |
| Secondary antibody | IF | Rat IgG    | Polyclonal Donkey | DyLight 755     | Fisher Scientific (SA510031)         | 1:500    |
| Secondary antibody | WB | Goat IgG   | Polyclonal Donkey | HRP             | Santa Cruz Biotechnology (sc-2020)   | 1:10,000 |
| Secondary antibody | WB | Rabbit IgG | Polyclonal Donkey | HRP             | Santa Cruz Biotechnology (sc-2313)   | 1:10,000 |
| Secondary antibody | WB | Sheep IgG  | Polyclonal Donkey | HRP             | Santa Cruz Biotechnology (sc-2473)   | 1:5,000  |

WB: Western Blotting, IF: Immunofluorescence, FC: Flow cytometry, HRP: Horseradish Peroxidase, FITC: Fluorescein isothiocyanate, APC: Allophycocyanin, PE: Phycoerythrin, PE-Cy7: Phycoerythrin-Cyanine 7, N/A: non-applicable.
